# Supplementary material for: HALT-IT - tranexamic acid for the treatment of gastrointestinal bleeding: study protocol for a randomised controlled trial
Source: PubMed Central journal article supplement (PMC4253634; doi:10.1186/1745-6215-15-450), 2014-11-19
Supplement: 13063_2014_2322_MOESM3_ESM.pdf [file 13063_2014_2322_MOESM3_ESM.pdf]

## THE HALT-IT TRIAL

### BRIEF INFORMATION ABOUT THE RESEARCH

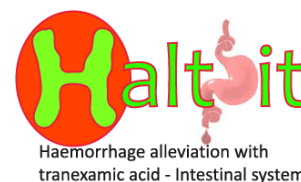

Tranexamic acid for the treatment of gastrointestinal haemorrhage:  
an international randomised, double blind placebo controlled trial

You (the patient) have bleeding from the gut that needs to be stopped quickly. All the usual treatments for the bleeding that we provide at this hospital will be given. As well as this, we are inviting you to take part in a study. This study will see if a treatment called *tranexamic acid* reduces gut bleeding. We hope that this treatment will lead to a better recovery. We know that the treatment helps people with other types of bleeding but we don't know yet if it works in gut bleeding.

In this study, half the patients will get the study treatment (*tranexamic acid*) and half a dummy treatment (a placebo). If you take part in this study, you (the patient) will receive the study treatment or placebo straight away. It will be given to you through a drip over 24 hours. We will also need to collect some information about your (the patient's) medical condition and send it to a central office in London.

If you would like to know more about our study now, then we will tell you. But otherwise we will tell you more about it later. Are you willing for us to go ahead with the study treatment?

**Yes, I am willing for you to go ahead.**

\_\_\_\_\_  
Name of Patient  
or representative

\_\_\_\_\_  
Date

\_\_\_\_\_  
Signature (thumbprint or  
other mark if unable to sign)

*[This information can be presented verbally and does not need to be used verbatim. It can be adapted to each situation and is provided to be used only as a guide. A signed form is not mandatory and if signed, must not be viewed as a valid Informed Consent.]*
